# Supplementary material
Source: PubMed Central journal article supplement (PMC9000524)
Supplement: NIHMS1790468-supplement-3.pdf [file NIHMS1790468-supplement-3.pdf]

Figure S1.

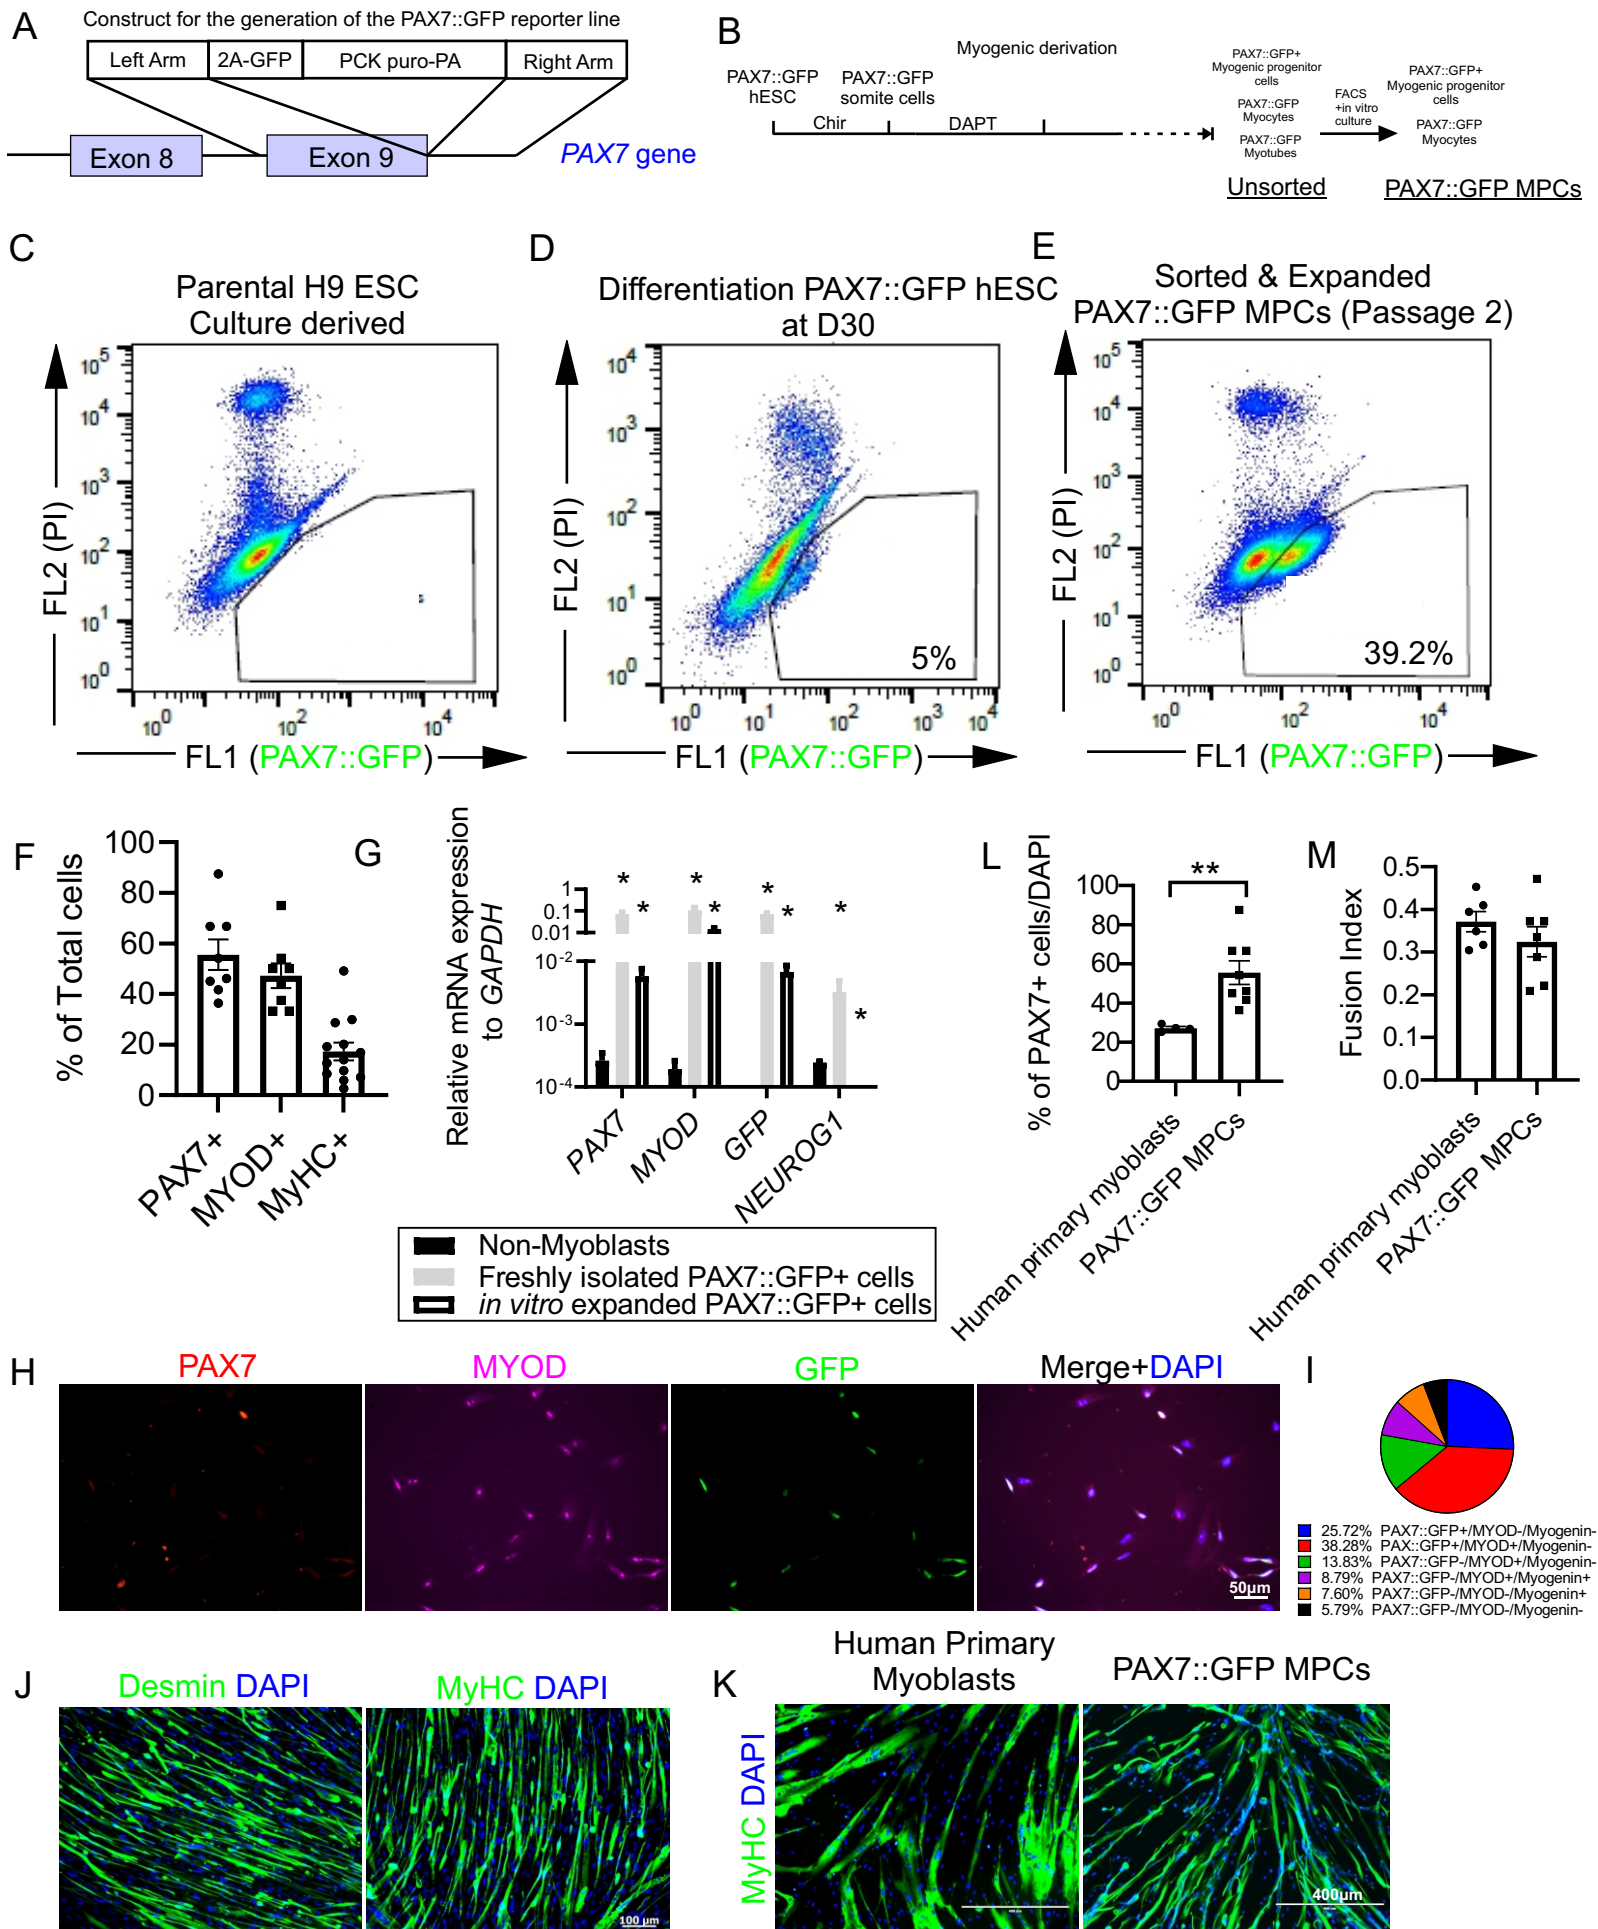

Figure S2.

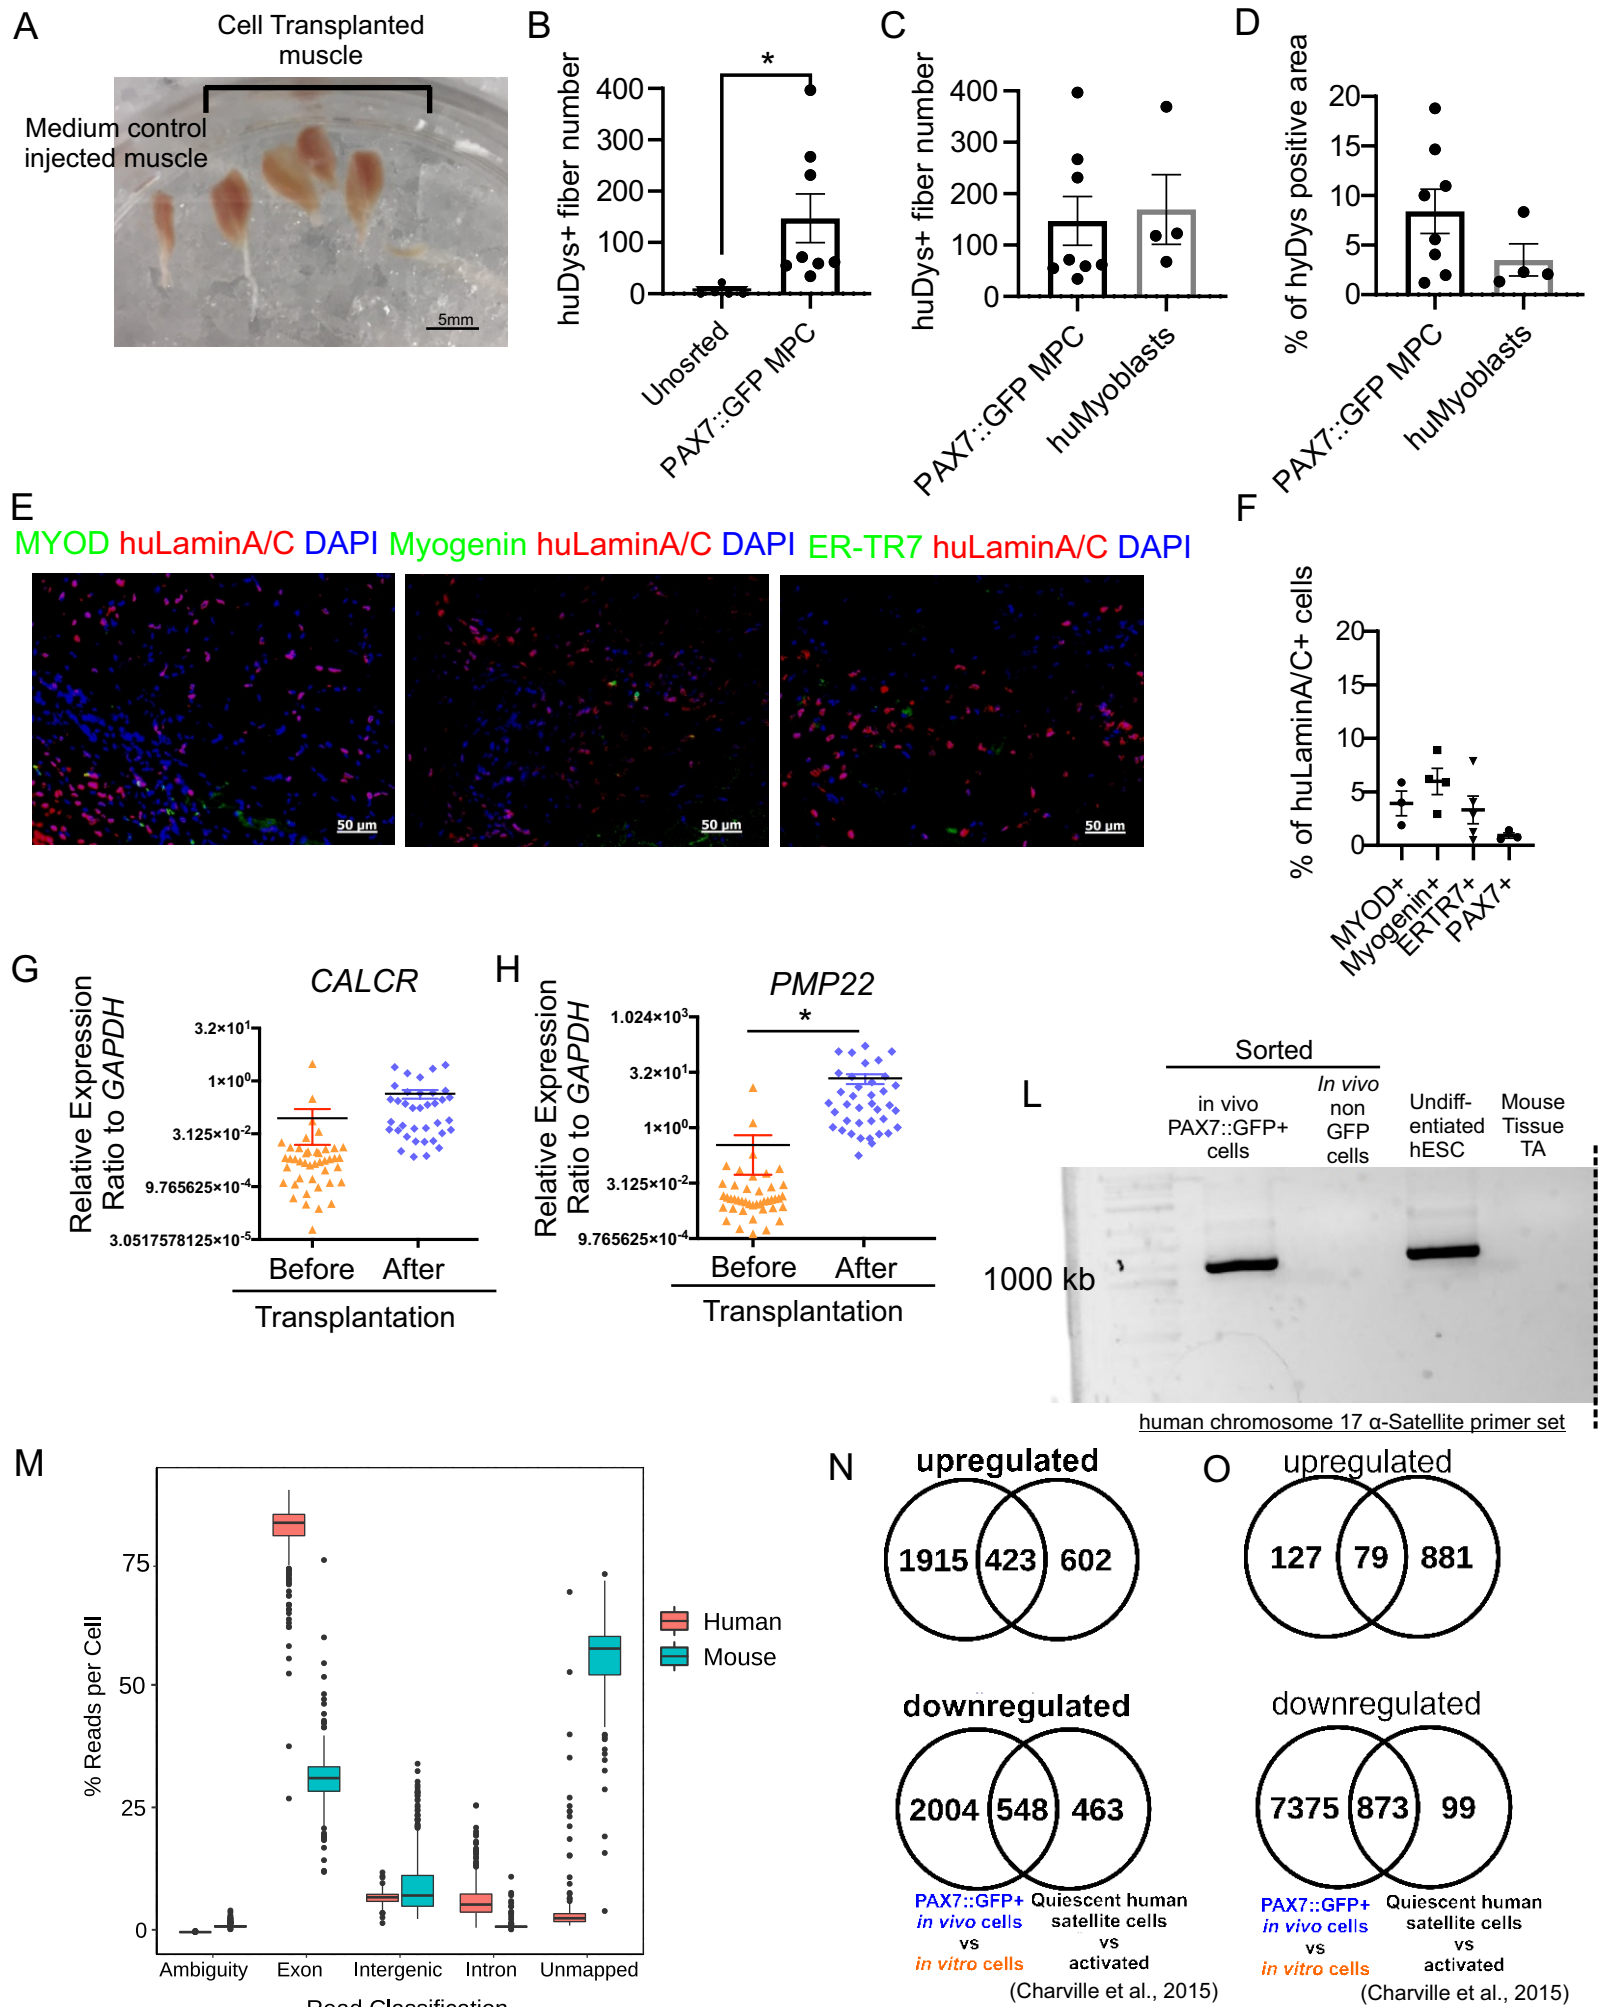

Figure S3.

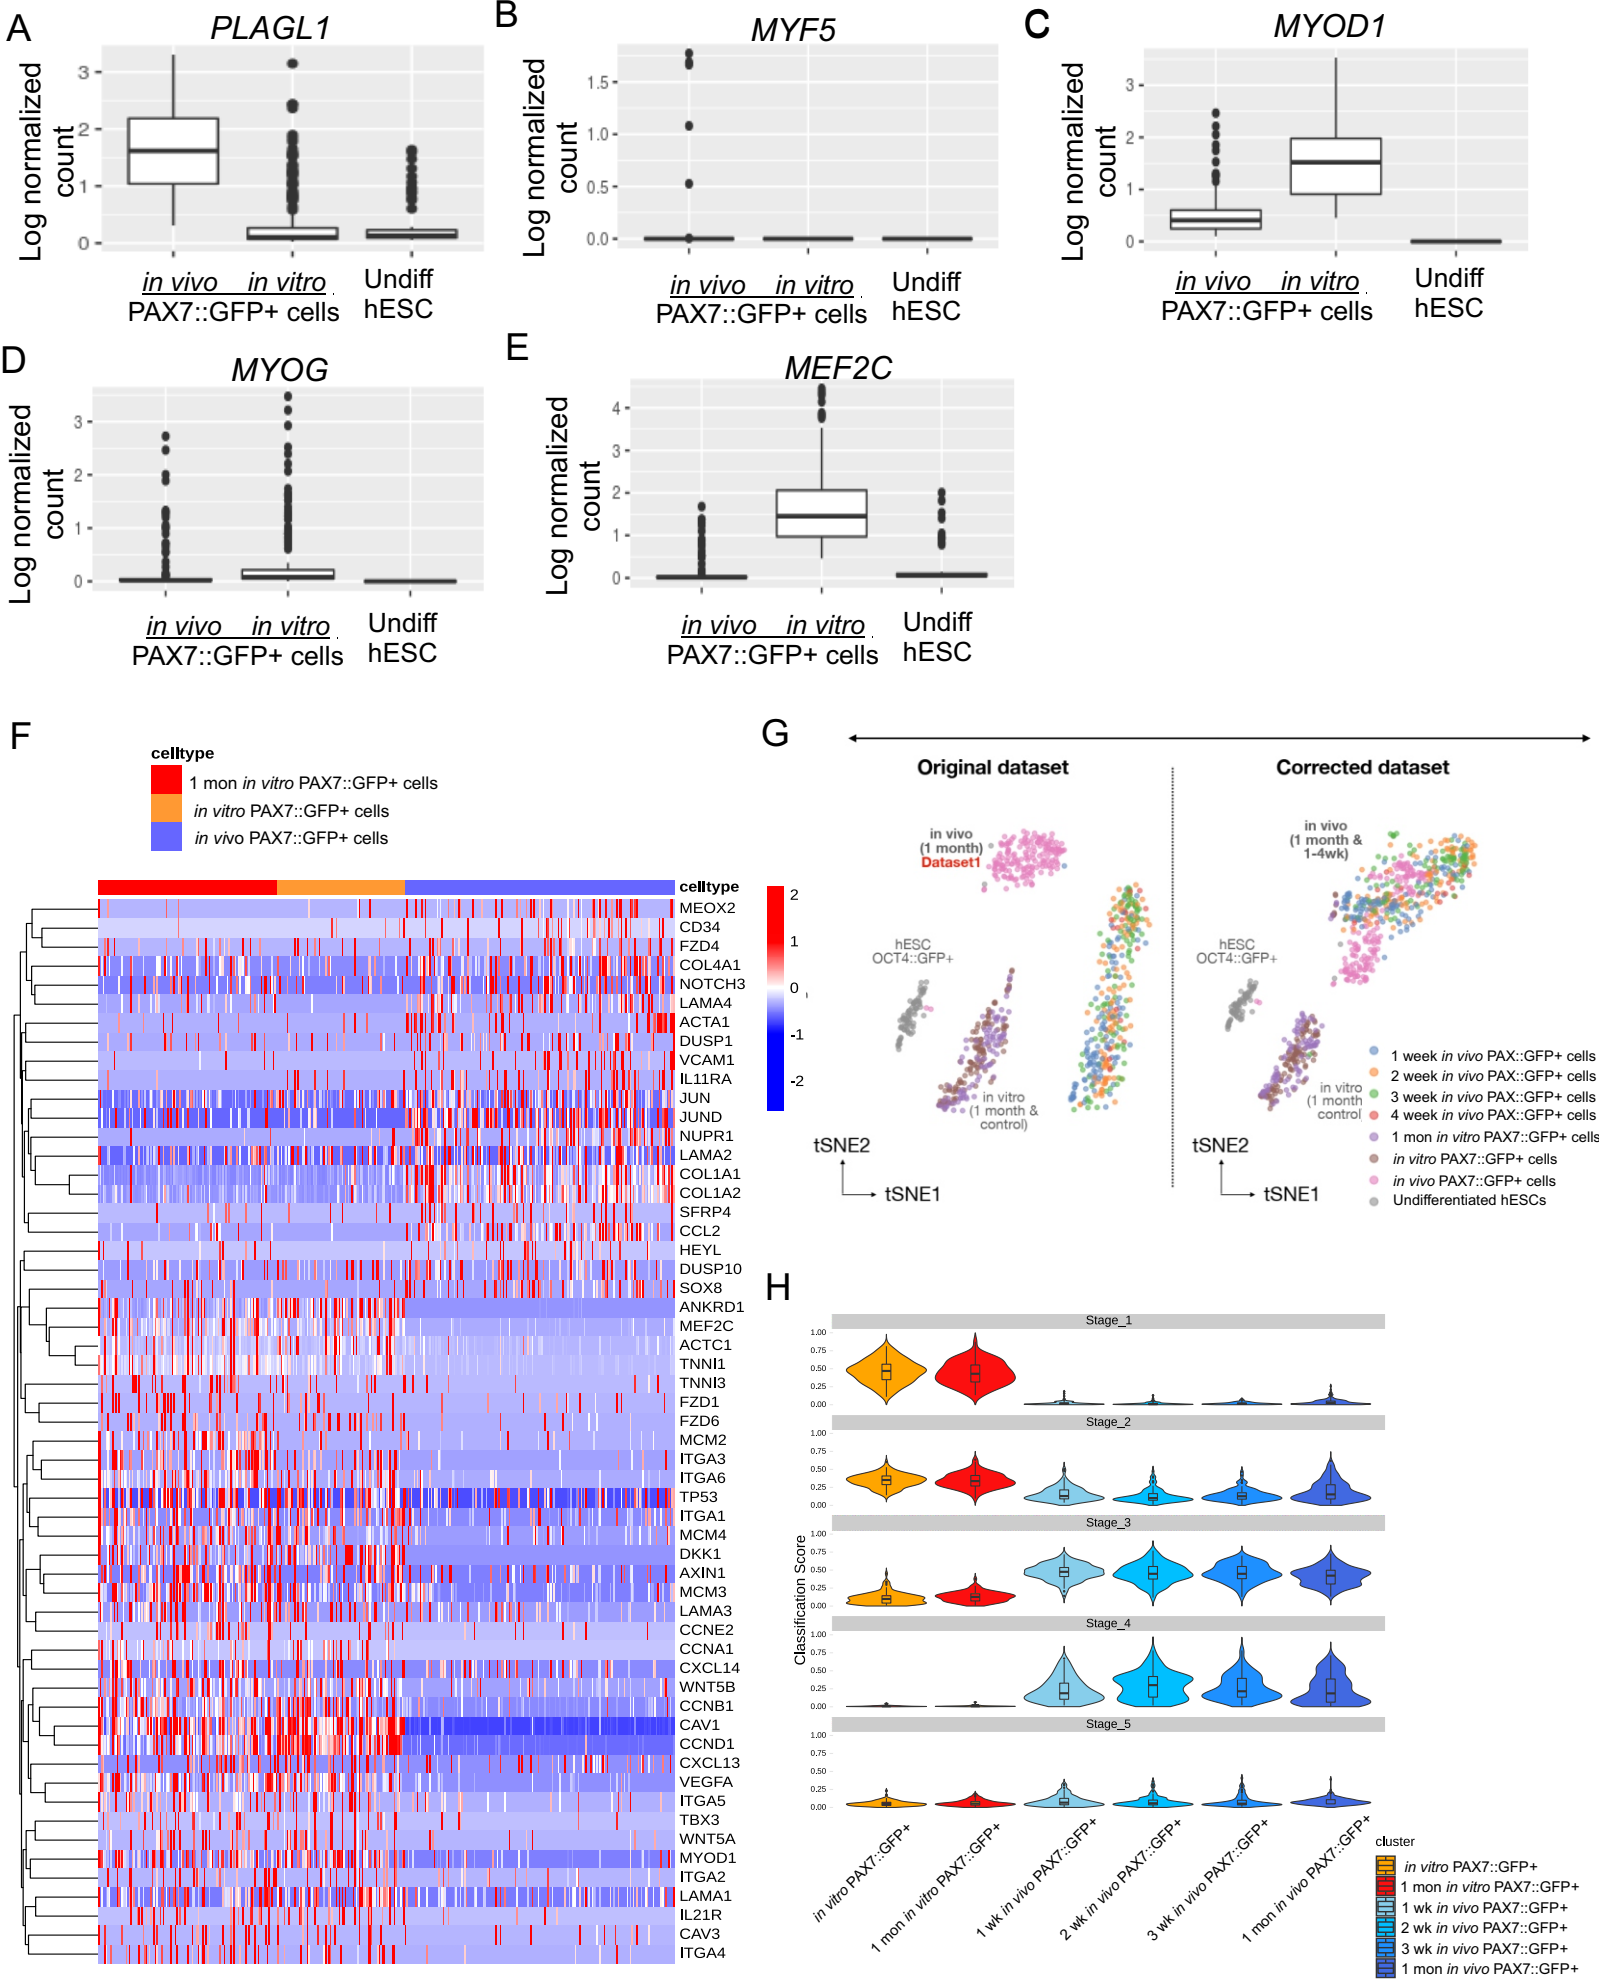

Figure S4

A

Serial transplantation

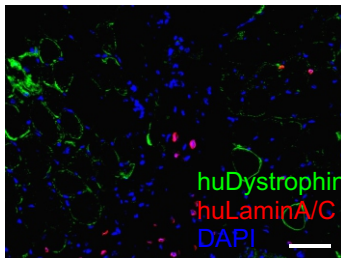

B

huDystrophin+ fiber number

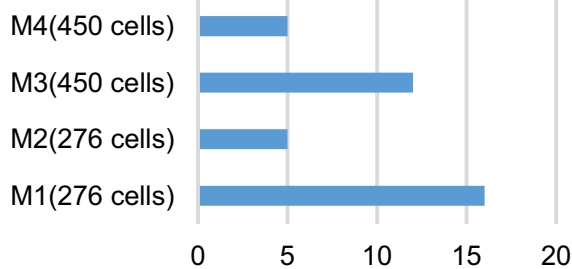

C

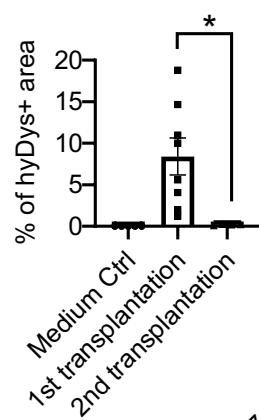

D

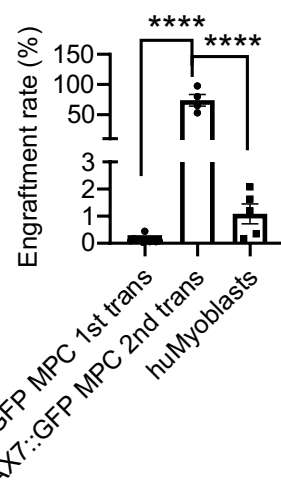

E

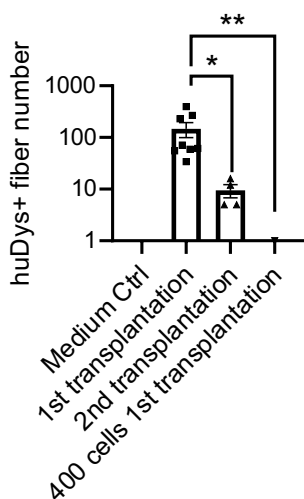

F

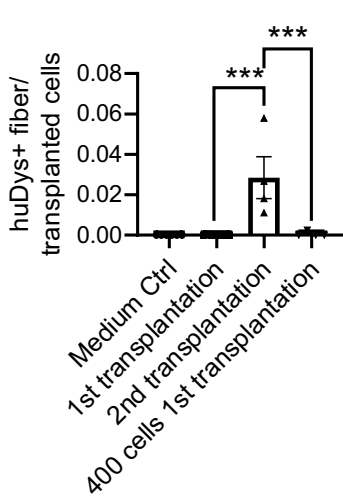

G

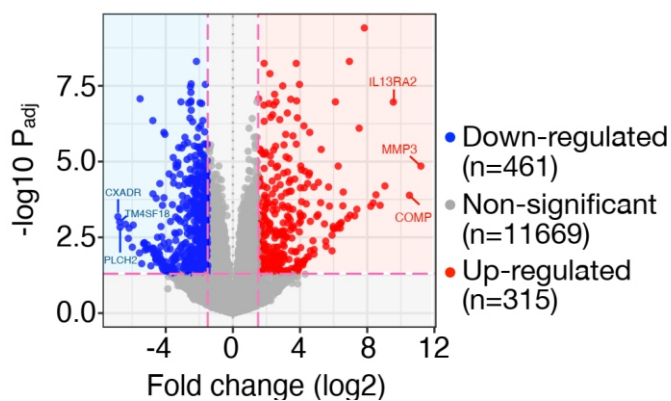

H

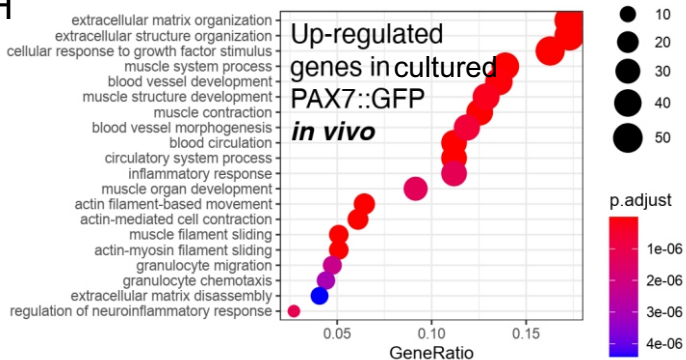

I

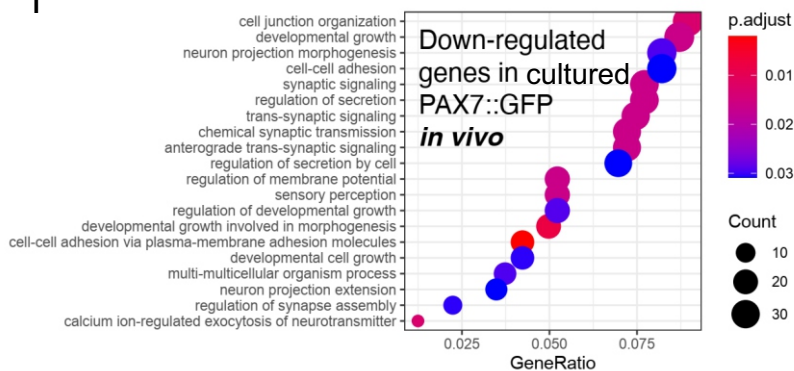

J

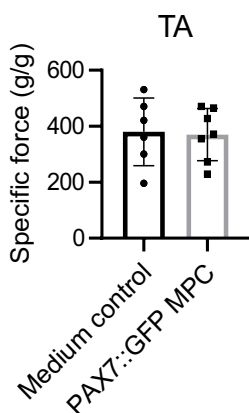

K

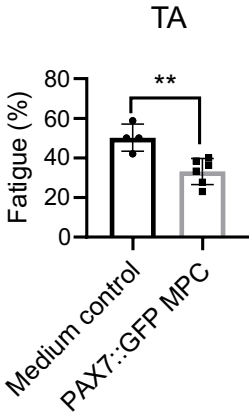

L

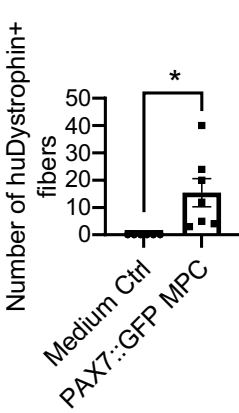

M

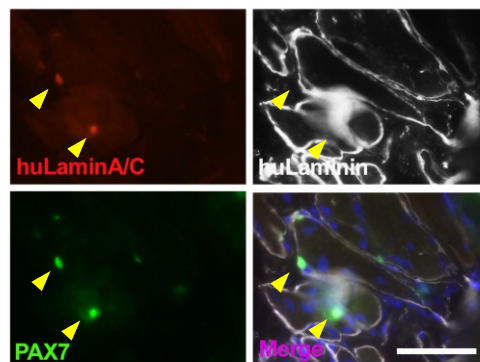

N

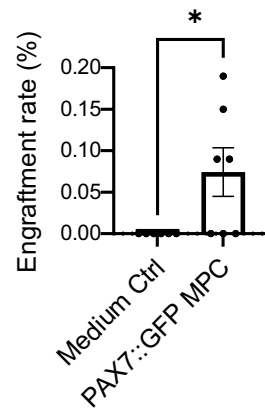



**Figure S1. Generation of PAX7::GFP MPCs from hESC differentiation cultures, related with Figure 1.** (A) Schematic of construct used to generate stable human hESC lines via CRISPR-Cas9. (B) Schematic of myogenic derivation protocol used to generate myogenic lineage cells and ultimately PAX7::GFP MPCs, which include PAX7 expressing myogenic progenitor cells and myocytes that do not express PAX7. (C-E) FACS plots showing enriching PAX7::GFP<sup>+</sup> cells from day 30 myogenic derivation culture and from expanded PAX7::GFP MPC culture. (F) Percentage of PAX7::GFP MPC expressing PAX7, MYOD and MyHC protein in *in vitro* culture (passage 2) (G) mRNA expression of *PAX7*, *MYOD*, *3e GFP*, and *NEUROG1* in PAX7::GFP<sup>+</sup> freshly sorted cells from myogenic derivation culture, PAX7::GFP<sup>+</sup> cells from PAX7::GFP MPC culture, or from non-myogenic cells (fibroblasts). (n=3, Student's t-test, \*p<0.05) (H) Immunocytochemistry images of PAX7::GFP MPC culture (passage 2) with PAX7, MYOD, and GFP antibodies showing the expression of these proteins. Scale bar=50µm. (I) Quantification of triple immunocytochemistry staining of GFP (representing PAX7::GFP), MYOD and Myogenin. (n=4) (J) Immunocytochemistry images of PAX7::GFP MPC under differentiation condition using MyHC and Desmin antibodies to label myotubes. PAX7::GFP MPC (passage 2) were cultured to confluence and switched to differentiation medium (without serum or growth factors) for 5 days. Scale bar=100µm (K) Immunocytochemistry images of MyHC of differentiation culture (5 days) of human primary myoblasts and PAX7::GFP MPCs showing myotube formation. (L) Quantification of PAX7<sup>+</sup> cells ratio to total nuclei in proliferation culture of human primary myoblasts (passage 3) and PAX7::GFP MPCs (passage 3) culture showing PAX7::GFP MPC culture contains significantly more PAX7 expressing cells. (M) Fusion index (nuclei in myotube/total myotubes) comparison between human primary myoblasts and PAX7::GFP MPCs in differentiation culture. (n(PAX7::GFP MPC)=5, n(Human Myoblasts)=7, Student's t-test, \*p<0.05, \*\*p<0.01. Result=Mean±SEM.

**Figure S2. PAX7::GFP MPCs participated in muscle regeneration of NSG mice and the *in vivo* PAX7::GFP<sup>+</sup> cells express muscle stem cell markers, related with Figure 1 and 2.** (A) Image of TAs that had PAX7::GFP MPC transplantation and TA that had medium control injection. (B) Quantification of huDystrophin<sup>+</sup> fibers in TA that were transplanted with unsorted cells from myogenic derivation culture or expanded PAX7::GFP MPC (n(Unsorted)=3, n(Expanded)=8; Student's t-test, \*p<0.05). (C-D) Quantification of huDystrophin<sup>+</sup> fiber number and percentage of huDystrophin area in TA that were transplanted with expanded PAX7::GFP MPC and human primary myoblasts (huMyoblasts) (n(PAX7::GFP MPC)=8, n(huMyoblasts)=4; Student's t-test, \*p<0.05). (E) Representative images of TA transplanted with PAX7::GFP MPCs at day 30 post transplantation, stained with MYOD, Myogenin and ERTR7 antibodies. (F) Quantification of cells expressing MYOD, Myogenin and ERTR7, percentage of the total huLaminA/C positive cells. (G-H) Single cell Q-PCR showing quiescent muscle stem cell markers (*CALCR*, *PMP22*) were expressed at higher level in *in vivo* PAX7::GFP<sup>+</sup> cells compared with *in vitro* PAX7::GFP<sup>+</sup> cells (n=48; Student's t-test, \*p<0.05) (L) Gel image of the PCR product (1171bp) using a chromosome 17 α-satellite human specific primer pair to amplify DNA from the four types of cells. (Dotted line indicates the position of deletion of superfluous lanes) (M) Distribution of Single cell RNA-seq data of *in vivo* PAX7::GFP<sup>+</sup> cells in human and mouse genome showing the vast majority of the *in vivo* PAX7::GFP<sup>+</sup> cells collected by FACS are human cells. (N) Venn diagram showing overlapping up- and down- regulated genes in *in vivo* PAX7::GFP<sup>+</sup> cells compared with quiescent human satellite cells (huSCs) assuming constant RNA content. (O) Venn diagram showing overlapping up- and down- regulated genes in *in vivo* PAX7::GFP<sup>+</sup> cells compared with quiescent huSCs assuming non-constant RNA content (Charville et al., 2015).

**Figure S3. Gene expression analysis of single cell RNA-seq including *in vivo* PAX7::GFP<sup>+</sup> collected at 1-, 2-, 3-, and 4-week time points after transplantation, related with Figure 3.** (A-E) Normalized mRNA expression comparison of the single cell RNA seq data between *in vivo* PAX7::GFP<sup>+</sup> cells, *in vitro* PAX7::GFP<sup>+</sup> cells, and hESCs. (F) Heat map of single cell RNA-seq result showing gene expression from each cell from *in vivo*, *in vitro*, and 1 month *in vitro* PAX7::GFP<sup>+</sup> cell groups. Genes presented in this heat map are related to the pathways shown in Figure 2F. (G) T-SNE plots of *in vivo* PAX7::GFP<sup>+</sup> cells harvested 1-week, 2-weeks, 3-weeks and 4-weeks after transplantation in a combination with *in vivo* PAX7::GFP<sup>+</sup> cells, *in vitro* cells, and 1 month *in vitro* cells from the first single cell RNA-seq study. (H) Violin plot showing the developmental stages of *in vivo* PAX7::GFP<sup>+</sup> cells at the aforementioned time points following the transplantation.

**Figure S4. *In vivo* engraftment enhanced PAX7::GFP+ cells regeneration capability and the transplantation result of NSG-*mdx* mice, related with Figure 4.** (A) Representative immunohistochemistry image of NSG mouse TA after serial transplantation showing huDystrophin+ muscle fiber formed from the secondary transplanted cells. Scale bar=50 $\mu$ m. (B) Quantification of huDystrophin+ fiber numbers from each NSG mouse that received serial PAX7::GFP+ cell transplantation. Cell number being transplanted was listed for each mouse (M 1-4). Result=Mean $\pm$ SEM. (C) Quantification of huDystrophin+ area from the entire TA cross section area (n(Control)=3, n(1<sup>st</sup> transplantation)=6, n(2<sup>nd</sup> transplantation)=4; One-way ANOVA, \*p<0.05). (D) Quantification of cells located between muscle fiber and basal lamina (huLaminin labeled) that originated from PAX7::GFP MPCs (Pax7+, huLaminA/C+) after 1st or 2nd transplantation, as a proportion of the total number of PAX7::GFP MPCs transplanted. n(1st transplantation)=11, n(2nd transplantation)=4; n(humyoblast)=4, (c) student t test (d) one-way ANOVA, \*\*p<0.001, \*\*\*\*p<0.00001). (E) Quantification of huDystrophin+ fibers from the entire TA (n(Control)=3, n(1<sup>st</sup> transplantation)=6, n(2<sup>nd</sup> transplantation)=4, n(400 cells)=4; One-way ANOVA, \*p<0.05). (F) Quantification of ratio of huDystrophin+ fibers to the cell numbers being injected (n(Control)=3, n(1<sup>st</sup> transplantation)=6, n(2<sup>nd</sup> transplantation)=4; n(400 cells)=4; One-way ANOVA, \*\*\*\*p<0.001). (G) A volcano plot and gene ontology (H-I) analysis of differentially expressed genes, up- and down-regulated in *in vivo* PAX7::GFP+ cells that were isolated from primary recipient mice and cultured *in vitro* for 4 days (right before 2<sup>nd</sup> transplantation) in comparison with *in vitro* maintained PAX7::GFP MPCs (right before 1<sup>st</sup> transplantation). (J-N) Experimental results of NSG-*mdx* cohort-2. (J) Specific force (muscle force normalized to muscle mass (MM), g/g) of TA muscle (n(Control)=6, n(PAX7::GFP MPCs)=7; student's t test). (K) Fatigue index (%) represents the reduction in maximal tetanic tension measured after 5 minutes of repeated tetanic stimulation at 1 Hz in TA muscle (n(Control)=6, n(PAX7::GFP MPC)=5; student's t test, \*\*p<0.01). (L) Quantification of combined number of huDystrophin+ fibers in TA, Gas, and Quad in NSG-*mdx* mice. (n(Control)=6, n(PAX7::GFP MPC)=7; Student's t-test, \*p<0.05). (M) Representative images of sectioned TAs 4 weeks after the PAX7::GFP MPC transplantation into NSG-*mdx* mice. PAX7::GFP MPC progenies could be identified by double labeling with huLaminA/C (red) and PAX7 (green) antibodies. They locate under basal lamina (yellow arrow). Scale bar=50 $\mu$ m. (N) Quantification of cells located between muscle fiber and basal lamina (huLaminin labeled) that originated from PAX7::GFP MPCs (PAX7+, huLaminA/C+) after transplantation, as a proportion of the total number of PAX7::GFP MPCs transplanted (combined number in TA, Gas, and Quad in NSG-*mdx* mice). (n(Control)=6, n(PAX7::GFP MPC)=7; Student's t-test, \*p<0.05). Result=Mean $\pm$ SEM.
